# Supplementary material for: Evidence of Calcium Signaling and Modulation of the LmrS Multidrug Resistant Efflux Pump Activity by Ca2 + Ions in S. aureus
Source: PubMed Central journal article supplement (PMC7642317; doi:10.3389/fmicb.2020.573388), 2020-10-22
Supplement: Data_Sheet_1.pdf [file Data_Sheet_1.pdf]

### Original Data Set

| Minutes control" | " <i>lmrS</i> Clone" | " <i>lmrS</i> Clone" | " <i>lmrS</i> Clone" | " <i>E. coli</i> control" | " <i>E. coli</i> |     |
|------------------|----------------------|----------------------|----------------------|---------------------------|------------------|-----|
| 1                | 147                  | 158.8712             | 161                  | 246                       | 245              | 249 |
| 2                | 149                  | 159.1111             | 161                  | 246                       | 242              | 245 |
| 3                | 150                  | 158.3146             | 159                  | 245                       | 242              | 244 |
| 4                | 148                  | 157.0426             | 158                  | 247                       | 242              | 247 |
| 5                | 147                  | 156.8048             | 157                  | 248                       | 245              | 247 |
| 6                | 148                  | 157.4783             | 157                  | 249                       | 247              | 249 |
| 7                | 149                  | 157.7013             | 158                  | 248                       | 244              | 245 |
| 8                | 149                  | 158.7006             | 157                  | 245                       | 242              | 242 |
| 9                | 149                  | 157.7192             | 158                  | 245                       | 241              | 242 |
| 10               | 150                  | 157.4164             | 158                  | 246                       | 243              | 241 |
| 11               | 150                  | 158.4405             | 158                  | 246                       | 244              | 242 |
| 12               | 149                  | 157.6932             | 158                  | 245                       | 242              | 241 |
| 13               | 149                  | 158.8472             | 157                  | 246                       | 244              | 241 |
| 14               | 151                  | 158.7223             | 158                  | 245                       | 242              | 240 |
| 15               | 151                  | 160.4564             | 159                  | 244                       | 240              | 241 |
| 16               | 150                  | 160.9971             | 158                  | 245                       | 241              | 240 |
| 17               | 149                  | 160.7805             | 159                  | 246                       | 242              | 239 |
| 18               | 150                  | 159.8787             | 158                  | 246                       | 243              | 240 |
| 19               | 150                  | 160.7781             | 159                  | 244                       | 242              | 239 |
| 20               | 151                  | 161.1780             | 158                  | 244                       | 244              | 239 |

### Normalized Data

| Minutes control" | " <i>lmrS</i> Clone" | " <i>lmrS</i> Clone" | " <i>lmrS</i> Clone" | " <i>E. coli</i> control" | " <i>E. coli</i> |        |
|------------------|----------------------|----------------------|----------------------|---------------------------|------------------|--------|
| 1.000            | -2.052               | 1.638                | 2.300                | 0.650                     | 0.500            | 1.100  |
| 2.000            | -1.430               | 1.713                | 2.300                | 0.650                     | 0.050            | 0.500  |
| 3.000            | -1.119               | 1.465                | 1.678                | 0.500                     | 0.050            | 0.350  |
| 4.000            | -1.741               | 1.070                | 1.367                | 0.800                     | 0.050            | 0.800  |
| 5.000            | -2.052               | 0.996                | 1.056                | 0.950                     | 0.500            | 0.800  |
| 6.000            | -1.741               | 1.205                | 1.056                | 1.100                     | 0.800            | 1.100  |
| 7.000            | -1.430               | 1.274                | 1.367                | 0.950                     | 0.350            | 0.500  |
| 8.000            | -1.430               | 1.585                | 1.056                | 0.500                     | 0.050            | 0.050  |
| 9.000            | -1.430               | 1.280                | 1.367                | 0.500                     | -0.100           | 0.050  |
| 10.000           | -1.119               | 1.186                | 1.367                | 0.650                     | 0.200            | -0.100 |
| 11.000           | -1.119               | 1.504                | 1.367                | 0.650                     | 0.350            | 0.050  |
| 12.000           | -1.430               | 1.272                | 1.367                | 0.500                     | 0.050            | -0.100 |
| 13.000           | -1.430               | 1.630                | 1.056                | 0.650                     | 0.350            | -0.100 |
| 14.000           | -0.809               | 1.592                | 1.367                | 0.500                     | 0.050            | -0.250 |
| 15.000           | -0.809               | 2.131                | 1.678                | 0.350                     | -0.250           | -0.100 |
| 16.000           | -1.119               | 2.299                | 1.367                | 0.500                     | -0.100           | -0.250 |
| 17.000           | -1.430               | 2.231                | 1.678                | 0.650                     | 0.050            | -0.400 |
| 18.000           | -1.119               | 1.951                | 1.367                | 0.650                     | 0.200            | -0.250 |
| 19.000           | -1.119               | 2.231                | 1.678                | 0.350                     | 0.050            | -0.400 |

20.000 -0.809 2.355 1.367 0.350 0.350 -0.400

### **Kolmogorov-Smirnov test**

"Table Analyzed"     "*E.coli* control vs *lmrS* clone Normalization Data"

"Column A"   "*lmrS* Clone"

vs.     vs.

"Column B"   "*E. coli* control"

"Kolmogorov-Smirnov test"

" P value"   0.0015

" Exact or approximate p value?"   Approximate

" P value summary" \*\*

" Significantly different ( $P < 0.05$ )?"     Yes

" Kolmogorov-Smirnov D" 0.6000

The original data set represents three biological replicates or sub-columns. Each strain was prepared and resuspended in PBS as described in the materials and methods. The experiments were conducted over a twenty minute timeframe. Each of the sub-columns were averaged and the means were normalized. 0% was defined as the lowest mean in each data set as well as  $y=0$  (data not shown). 100% was defined as the largest mean in each data set or at a value above the fluorescent values of both strains. Both normalized data sets were analyzed using a Kolmogorov-Smirnov test. Significant differences were found between both data sets with an approximate P value of ( $p < 0.0015$ ).
