# Supplementary material for: Evidence of Calcium Signaling and Modulation of the LmrS Multidrug Resistant Efflux Pump Activity by Ca2 + Ions in S. aureus
Source: PubMed Central journal article supplement (PMC7642317; doi:10.3389/fmicb.2020.573388), 2020-10-22
Supplement: Data_Sheet_2.pdf [file Data_Sheet_2.pdf]

## Supplementary data Metals Assay

We evaluated the effect of various divalent cations ( $\text{CaCl}_2$ ,  $\text{ZnCl}_2$ ,  $\text{MgCl}_2$  and  $\text{KCl}$  at a concentration of 1 mM) on efflux of EtBr in *S. aureus* cells. Cells were pelleted and washed twice with PBS to remove excess BHI. They were then incubated for 30 minutes in EtBr and a divalent metal cation. Fluorescence was subsequently monitored for 20 min at 585 nm. The data indicated that  $\text{CaCl}_2$  had a significantly greater (Kruskal-Wallis  $p < 0.0001$ ) effect on the efflux of EtBr compared to the other metals and control (*S. aureus* cells and EtBr without metal)

## Divalent cations assay- Supplementary Figure

*S. aureus* cells were incubated in 1mM of divalent metals,  $\text{MgCl}_2$ ,  $\text{CaCl}_2$ ,  $\text{ZnCl}_2$ ,  $\text{KCl}$  and EtBr alone (control) for observation of efflux. Significant differences were observed between  $\text{Ca}^{2+}$  and other divalent metals as well as the control. Each time point represents the average mean  $\pm$  SD of at least three biological replicates and three independent experiments. A Kruskal-Wallis analysis was used to determine significant differences. ( $p < 0.0001$ ).
